# Supplementary material
Source: PubMed Central journal article supplement (PMC6559361)
Supplement: NIHMS1519804-supplement-8.pdf [file NIHMS1519804-supplement-8.pdf]

**Table S1. Viability of Mutant Mice Generated in this Study, Related to Figures 1 and 6**

**Offspring of *Cyrano* 2A9<sup>+/-</sup> x *Cyrano* 2A9<sup>+/-</sup> Cross**

|                | <i>Cyrano</i> 2A9 <sup>+/+</sup> | <i>Cyrano</i> 2A9 <sup>+/-</sup> | <i>Cyrano</i> 2A9 <sup>-/-</sup> |
|----------------|----------------------------------|----------------------------------|----------------------------------|
| Observed (P21) | 81                               | 154                              | 76                               |
| % observed     | 26                               | 50                               | 24                               |
| % expected     | 25                               | 50                               | 25                               |

Shown are results of crossing heterozygous mice on a SV129; C57Bl/6J background derived from targeted ESC clone 2A9. Statistical significance was determined by  $\chi^2$  test ( $p = 0.91$ ).

**Offspring of *Cyrano* 1F1<sup>+/-</sup> x *Cyrano* 1F1<sup>+/-</sup> Cross**

|                | <i>Cyrano</i> 1F1 <sup>+/+</sup> | <i>Cyrano</i> 1F1 <sup>+/-</sup> | <i>Cyrano</i> 1F1 <sup>-/-</sup> |
|----------------|----------------------------------|----------------------------------|----------------------------------|
| Observed (P21) | 24                               | 55                               | 26                               |
| % observed     | 23                               | 52                               | 25                               |
| % expected     | 25                               | 50                               | 25                               |

Shown are results of crossing heterozygous mice on a SV129; C57Bl/6J background derived from targeted ESC clone 1F1. Statistical significance was determined by  $\chi^2$  test ( $p = 0.85$ ).

**Offspring of *Mir7a1*<sup>+/-</sup>; *Mir7b*<sup>+/-</sup> x *Mir7a1*<sup>+/-</sup>; *Mir7b*<sup>+/-</sup> Cross**

|                | <i>Mir7a1</i> <sup>+/+</sup> |                             |                             | <i>Mir7a1</i> <sup>+/-</sup> |                             |                             | <i>Mir7a1</i> <sup>-/-</sup> |                             |                             |
|----------------|------------------------------|-----------------------------|-----------------------------|------------------------------|-----------------------------|-----------------------------|------------------------------|-----------------------------|-----------------------------|
|                | <i>Mir7b</i> <sup>+/+</sup>  | <i>Mir7b</i> <sup>+/-</sup> | <i>Mir7b</i> <sup>-/-</sup> | <i>Mir7b</i> <sup>+/+</sup>  | <i>Mir7b</i> <sup>+/-</sup> | <i>Mir7b</i> <sup>-/-</sup> | <i>Mir7b</i> <sup>+/+</sup>  | <i>Mir7b</i> <sup>+/-</sup> | <i>Mir7b</i> <sup>-/-</sup> |
| Observed (P21) | 9                            | 13                          | 8                           | 17                           | 33                          | 19                          | 5                            | 18                          | 8                           |
| % observed     | 7                            | 10                          | 6                           | 13                           | 25                          | 15                          | 4                            | 14                          | 6                           |
| % expected     | 6                            | 12.5                        | 6                           | 12.5                         | 25                          | 12.5                        | 6                            | 12.5                        | 6                           |

Shown are results of crossing double heterozygous mice on a C57Bl/6J background. Statistical significance was determined by  $\chi^2$  test ( $p = 0.95$ ).

**Male Offspring of *Cyrano*<sup>+/-</sup>; *Cdr1as*<sup>671\_18/y</sup> x *Cyrano*<sup>+/-</sup>; *Cdr1as*<sup>+671\_18</sup> Cross**

|                | <i>Cdr1as</i> <sup>+y</sup>  |                              |                              | <i>Cdr1as</i> <sup>671_18/y</sup> |                              |                              |
|----------------|------------------------------|------------------------------|------------------------------|-----------------------------------|------------------------------|------------------------------|
|                | <i>Cyrano</i> <sup>+/+</sup> | <i>Cyrano</i> <sup>+/-</sup> | <i>Cyrano</i> <sup>-/-</sup> | <i>Cyrano</i> <sup>+/+</sup>      | <i>Cyrano</i> <sup>+/-</sup> | <i>Cyrano</i> <sup>-/-</sup> |
| Observed (P21) | 14                           | 31                           | 10                           | 11                                | 29                           | 14                           |
| % observed     | 13                           | 28                           | 9                            | 10                                | 27                           | 13                           |
| % expected     | 12.5                         | 25                           | 12.5                         | 12.5                              | 25                           | 12.5                         |

Shown are results of crossing double mutant mice on a C57Bl/6J background. Statistical significance was determined by  $\chi^2$  test ( $p = 0.83$ ).

**Female Offspring of *Cyrano*<sup>+/-</sup>; *Cdr1as*<sup>671\_18/y</sup> x *Cyrano*<sup>+/-</sup>; *Cdr1as*<sup>+671\_18</sup> Cross**

|  | <i>Cdr1as</i> <sup>+671_18</sup> |                              |                              | <i>Cdr1as</i> <sup>671_18/671_18</sup> |                              |                              |
|--|----------------------------------|------------------------------|------------------------------|----------------------------------------|------------------------------|------------------------------|
|  | <i>Cyrano</i> <sup>+/+</sup>     | <i>Cyrano</i> <sup>+/-</sup> | <i>Cyrano</i> <sup>-/-</sup> | <i>Cyrano</i> <sup>+/+</sup>           | <i>Cyrano</i> <sup>+/-</sup> | <i>Cyrano</i> <sup>-/-</sup> |

|                |      |    |      |      |    |      |
|----------------|------|----|------|------|----|------|
| Observed (P21) | 17   | 24 | 15   | 15   | 23 | 9    |
| % observed     | 17   | 23 | 15   | 15   | 22 | 9    |
| % expected     | 12.5 | 25 | 12.5 | 12.5 | 25 | 12.5 |

Shown are results of crossing double mutant mice on a C57Bl/6J background. Statistical significance was determined by  $\chi^2$  test ( $p = 0.61$ ).

**Male Offspring of *Cyrano*<sup>+/-</sup>; *Cdr1as*<sup>671\_54/y</sup> x *Cyrano*<sup>+/-</sup>; *Cdr1as*<sup>+/671\_54</sup> Cross**

|                | <i>Cdr1as</i> <sup>+/y</sup> |                              |                              | <i>Cdr1as</i> <sup>671_54/y</sup> |                              |                              |
|----------------|------------------------------|------------------------------|------------------------------|-----------------------------------|------------------------------|------------------------------|
|                | <i>Cyrano</i> <sup>+/+</sup> | <i>Cyrano</i> <sup>+/-</sup> | <i>Cyrano</i> <sup>-/-</sup> | <i>Cyrano</i> <sup>+/+</sup>      | <i>Cyrano</i> <sup>+/-</sup> | <i>Cyrano</i> <sup>-/-</sup> |
| Observed (P21) | 12                           | 18                           | 9                            | 6                                 | 19                           | 9                            |
| % observed     | 16                           | 25                           | 12                           | 8                                 | 26                           | 12                           |
| % expected     | 12.5                         | 25                           | 12.5                         | 12.5                              | 25                           | 12.5                         |

Shown are results of crossing double mutant mice on a C57Bl/6J background. Statistical significance was determined by  $\chi^2$  test ( $p = 0.85$ ).

**Female Offspring of *Cyrano*<sup>+/-</sup>; *Cdr1as*<sup>671\_54/y</sup> x *Cyrano*<sup>+/-</sup>; *Cdr1as*<sup>+/671\_54</sup> Cross**

|                | <i>Cdr1as</i> <sup>+/671_54</sup> |                              |                              | <i>Cdr1as</i> <sup>671_54/671_54</sup> |                              |                              |
|----------------|-----------------------------------|------------------------------|------------------------------|----------------------------------------|------------------------------|------------------------------|
|                | <i>Cyrano</i> <sup>+/+</sup>      | <i>Cyrano</i> <sup>+/-</sup> | <i>Cyrano</i> <sup>-/-</sup> | <i>Cyrano</i> <sup>+/+</sup>           | <i>Cyrano</i> <sup>+/-</sup> | <i>Cyrano</i> <sup>-/-</sup> |
| Observed (P21) | 4                                 | 19                           | 4                            | 11                                     | 16                           | 6                            |
| % observed     | 7                                 | 32                           | 7                            | 18                                     | 27                           | 10                           |
| % expected     | 12.5                              | 25                           | 12.5                         | 12.5                                   | 25                           | 12.5                         |

Shown are results of crossing double mutant mice on a C57Bl/6J background. Statistical significance was determined by  $\chi^2$  test ( $p = 0.28$ ).
