# Supplementary material
Source: PubMed Central journal article supplement (PMC6559361)
Supplement: NIHMS1519804-supplement-9.pdf [file NIHMS1519804-supplement-9.pdf]

---

**Table S2. RNA Molecules per Cell, Related to Figure 2**

---

| Cell type   | Total RNA/cell (pg) | Cyrano copies/cell | Cdr1as copies/cell | miR-7 copies/cell |
|-------------|---------------------|--------------------|--------------------|-------------------|
| CGN (DIV11) | 7.7 ± 0.9           | 102 ± 16           | 146 ± 37           | 40 ± 7            |
| HEK293T     | 19.9 ± 1.5          | 7 ± 2              | 6 ± 1              | 845 ± 204         |
| HeLa        | 23.2 ± 3.7          | 22 ± 3             | Not detected       | 148 ± 66          |

---
